# Supplementary material for: Specific Host Signatures for the Detection of Tuberculosis Infection in Children in a Low TB Incidence Country
Source: Frontiers journal article supplement (doi:10.3389/fimmu.2021.575519), 2021-03-15
Supplement: Table_4.pdf [file Table_4.pdf]

**Supplementary Table 4. PPD-, ESAT-6-, CFP-10-, and HBHA-induced cytokines (validation cohort).**

| Host-marker                     | PPD                              |                        |         |                      | ESAT-6                           |                      |         |                      | CFP-10                           |                       |         |                      | HBHA                             |                       |         |                      |
|---------------------------------|----------------------------------|------------------------|---------|----------------------|----------------------------------|----------------------|---------|----------------------|----------------------------------|-----------------------|---------|----------------------|----------------------------------|-----------------------|---------|----------------------|
|                                 | Median [P25-P75]<br>Non-infected | Infected               | p*      | Area under ROC curve | Median [P25-P75]<br>Non-infected | Infected             | p*      | Area under ROC curve | Median [P25-P75]<br>Non-infected | Infected              | p*      | Area under ROC curve | Median [P25-P75]<br>Non-infected | Infected              | p*      | Area under ROC curve |
| <b>IFN-<math>\gamma</math></b>  | 69<br>[10-168]                   | 20000<br>[15796-20000] | <0.0001 | 0.9788               | 10<br>[10-10]                    | 2408<br>[117-9657]   | <0.0001 | 0.92                 | 10<br>[10-10]                    | 2419<br>[167-20000]   | <0.0001 | 0.9679               | 10<br>[10-33]                    | 1000<br>[341-2405]    | <0.0001 | 0.9719               |
| <b>IP-10</b>                    | 10<br>[10-745]                   | 6976<br>[2415-15704]   | <0.0001 | 0.85                 | 50<br>[10-3156]                  | 9989<br>[4549-37804] | <0.0001 | 0.8313               | 10<br>[10-620]                   | 12414<br>[5542-56420] | <0.0001 | 0.9269               | 10<br>[10-1183]                  | 10542<br>[3887-59989] | <0.0001 | 0.8425               |
| <b>MIG</b>                      |                                  |                        |         |                      |                                  |                      |         |                      | 10<br>[10-1445]                  | 13441<br>[4263-42462] | <0.0001 | 0.8795               | 10<br>[10-911]                   | 15783<br>[7946-24065] | <0.0001 | 0.8438               |
| <b>MIP-1<math>\alpha</math></b> | 49<br>[26-85]                    | 2075<br>[332-2222]     | <0.0001 | 0.8225               | 10<br>[10-10]                    | 72<br>[12-344]       | <0.0001 | 0.8475               | 10<br>[10-10]                    | 140<br>[10-233]       | <0.0001 | 0.8128               | 10<br>[10-222]                   | 54<br>[29-122]        | <0.0001 | 0.84                 |
| <b>TNF-<math>\alpha</math></b>  | 352<br>[149-637]                 | 1188<br>[361-3574]     | 0.0013  | 0.7506               | 38<br>[10-61]                    | 281<br>[78-628]      | <0.0001 | 0.8469               | 10<br>[10-33]                    | 247<br>[87-687]       | <0.0001 | 0.8776               | 35<br>[11-96]                    | 187<br>[101-573]      | <0.0001 | 0.8344               |

Results of the measured concentrations are reported as medians and 25<sup>th</sup> – 75<sup>th</sup> percentiles in infected and non-infected children. The degrees of significance of the differences between the concentrations measured in the two groups of children are reported as *p* values. The diagnostic ability

of each cytokine was assessed by receiver operator characteristics (ROC) curve analysis and the areas under the curves are reported in the table.

\*Mann-Whitney test
